# Supplementary material
Source: Royal Society of Chemistry journal article supplement (doi:10.1039/d5sm00876j)
Supplement: d5sm00876j1.pdf [file d5sm00876j1.pdf]

## APPENDIX A: Formal Asymptotic Reduction of the Fluid Momentum and Wall Elasticity Governing Equations

### A.1 Fluid momentum conservation equation

The incompressible continuity equation for the fluid for 2D flow is given as,

$$\frac{\partial u}{\partial x} + \frac{\partial v}{\partial y} = 0 \quad (\text{A1})$$

Considering  $\bar{u} = u/U_r$ ,  $\bar{v} = v/V_r$ ,  $\bar{x} = x/L$  and  $\bar{y} = y/H$ , where  $U_r$  and  $V_r$  are reference axial and transverse fluid velocities, and employing lubrication approximation ( $H \ll L$  and  $\alpha = H/L \ll 1$ ), we obtain,  $V_r \sim U_r \alpha$ , or,  $V_r/U_r \ll 1$ .

The steady-state momentum conservation equation for the fluid can be given in the x-direction as,

$$\rho \left( u \frac{\partial u}{\partial x} + v \frac{\partial u}{\partial y} \right) = - \frac{\partial p}{\partial x} + \frac{\partial \tau_{xx}}{\partial x} + \frac{\partial \tau_{xy}}{\partial y} + F_x \quad (\text{A2})$$

where,  $F_x$  are the body forces acting in x-direction due to applied electric and magnetic forces.

Invoking scaling arguments from above, and using  $\bar{p} = p/(\lambda_L + 2G)$ ,  $\bar{\tau}_{xx} = \tau_{xx}/\tau_r$ ,  $\bar{\tau}_{xy} = \tau_{xy}/\tau_r$  and  $\bar{F}_x = F_x/F_r$  (where  $\tau_r (= \mu U_r/H)$  and  $F_r$  are the reference viscous stresses and body force terms respectively) the terms of Eq. A2 can be written as,

$$u \partial u / \partial x = (U_r^2/L) \bar{u} \partial \bar{u} / \partial \bar{x}$$

$$v \partial u / \partial y = (U_r^2/L) \bar{v} \partial \bar{u} / \partial \bar{y}$$

$$\partial p / \partial x = [(\lambda_L + 2G)/L] \partial \bar{p} / \partial \bar{x}$$

$$\partial \tau_{xx} / \partial x = (\mu U_r / HL) \partial \bar{\tau}_{xx} / \partial \bar{x}$$

$$\partial \tau_{xy} / \partial y = (\mu U_r / H^2) \partial \bar{\tau}_{xy} / \partial \bar{y}$$

$$\bar{F}_x = F_x / F_r$$

Substituting these terms in Eq. A2 and dividing the entire equation with  $\mu U_r / H^2$ , we obtain

$$Re \alpha \left( \bar{u} \frac{\partial \bar{u}}{\partial \bar{x}} + \bar{v} \frac{\partial \bar{u}}{\partial \bar{y}} \right) = - \xi_r \frac{\partial \bar{p}}{\partial \bar{x}} + \alpha \frac{\partial \bar{\tau}_{xx}}{\partial \bar{x}} + \frac{\partial \bar{\tau}_{xy}}{\partial \bar{y}} + \frac{H^2 F_r}{\mu U_r} \bar{F}_x \quad (\text{A3})$$

where,  $Re = \rho U_r H / \mu$ . Employing the considerations of creeping flow ( $Re \ll 1$ ) and lubrication approximation ( $\alpha \ll 1$ ), and expanding the force terms according to the discussions in Sec. 2.5, Eq. A3 reduces to,

$$0 = -\xi_r \frac{\partial \bar{p}}{\partial x} + \frac{\partial \bar{\tau}_{xy}}{\partial y} - Ha^2 \bar{u} + Ha S + \bar{\kappa}^2 \bar{\psi} \quad (\text{A4})$$

which is identical to Eq. 11.

The steady-state momentum conservation equation for the fluid can be given in the y-direction as,

$$\rho \left( u \frac{\partial v}{\partial x} + v \frac{\partial v}{\partial y} \right) = -\frac{\partial p}{\partial y} + \frac{\partial \tau_{yx}}{\partial x} + \frac{\partial \tau_{yy}}{\partial y} + F_y \quad (\text{A5})$$

Using the similar scaling arguments stated above, Eq. A5 evaluates as,

$$Re \alpha^2 \left( u \frac{\partial \bar{v}}{\partial x} + v \frac{\partial \bar{v}}{\partial y} \right) = -\frac{\xi_r \partial \bar{p}}{\alpha \partial y} + \alpha \frac{\partial \bar{\tau}_{yx}}{\partial x} + \frac{\partial \bar{\tau}_{yy}}{\partial y} + \frac{H^2 F_r \bar{F}_y}{\mu U_r} \quad (\text{A6})$$

or,

$$Re \alpha^3 \left( u \frac{\partial \bar{v}}{\partial x} + v \frac{\partial \bar{v}}{\partial y} \right) = -\xi_r \frac{\partial \bar{p}}{\partial y} + \alpha^2 \frac{\partial \bar{\tau}_{yx}}{\partial x} + \alpha \frac{\partial \bar{\tau}_{yy}}{\partial y} + \alpha \frac{H^2 F_r \bar{F}_y}{\mu U_r} \quad (\text{A7})$$

Again, for creeping flow ( $Re \ll 1$ ) and lubrication approximation ( $\alpha \ll 1$ ), Eq. A7 reduces to,

$$\frac{\partial \bar{p}}{\partial y} = 0 \quad (\text{A8})$$

Thus, pressure is independent of y.

## A.2 Wall elasticity equation

For homogeneous isotropic elastic solid walls exposed to no body forces, the Navier-Lame equation in the x-direction is:

$$G \left( \frac{\partial^2 \delta_x}{\partial x^2} + \frac{\partial^2 \delta_x}{\partial y^2} \right) + (\lambda_L + G) \frac{\partial}{\partial x} \left( \frac{\partial \delta_x}{\partial x} + \frac{\partial \delta_y}{\partial y} \right) = 0 \quad (\text{A9})$$

or,

$$(\lambda_L + 2G) \frac{\partial^2 \delta_x}{\partial x^2} + G \frac{\partial^2 \delta_x}{\partial y^2} + (\lambda_L + G) \frac{\partial^2 \delta_y}{\partial x \partial y} = 0 \quad (\text{A10})$$

Using considerations of slender wall scaling ( $D \ll L$  or  $\beta = D/L \ll 1$ ) and thick wall ( $D \sim H$  or  $\gamma = D/H \approx 1$ ), and using  $\bar{\delta}_x = \delta_x / \delta_r$  and  $\bar{\delta}_y = \delta_y / \delta_r$ , where  $\delta_r$  is the reference wall displacement,

$$\partial^2 \delta_x / \partial x^2 = \delta_r / L^2 \left( \partial^2 \bar{\delta}_x / \partial \bar{x}^2 \right) = \beta^2 \gamma^2 \delta_r / D^2 \left( \partial^2 \bar{\delta}_x / \partial \bar{x}^2 \right)$$

$$\partial^2 \delta_y / \partial y^2 = \gamma^2 \delta_r / D^2 \left( \partial^2 \bar{\delta}_y / \partial \bar{y}^2 \right)$$

$$\partial^2 \delta_y / \partial x \partial y = \gamma \delta_r / DL \left( \partial^2 \bar{\delta}_y / \partial \bar{x} \partial \bar{y} \right) = \beta \gamma^2 \delta_r / D^2 \left( \partial^2 \bar{\delta}_y / \partial \bar{x} \partial \bar{y} \right)$$

Comparing the terms, and since  $\beta = D/L \ll 1$ , Eq. A10 reduces to

$$\frac{\partial^2 \bar{\delta}_x}{\partial y^2} = 0 \quad (\text{A11})$$

This implies that axial displacement exhibits no transverse curvature. Also, since we observe,  $\partial^2 \delta_x / \partial x^2 \sim O(\beta^2) \ll 1$ , therefore axial stretching of the solid wall is negligible in comparison to transverse deformation.

For homogeneous isotropic elastic solid walls exposed to no body forces, the Navier-Lame equation in the y-direction is given as:

$$G \left( \frac{\partial^2 \delta_y}{\partial x^2} + \frac{\partial^2 \delta_y}{\partial y^2} \right) + (\lambda_L + G) \frac{\partial}{\partial y} \left( \frac{\partial \delta_x}{\partial x} + \frac{\partial \delta_y}{\partial y} \right) = 0 \quad (\text{A12})$$

or,

$$G \frac{\partial^2 \delta_y}{\partial x^2} + (\lambda_L + 2G) \frac{\partial^2 \delta_y}{\partial y^2} + (\lambda_L + G) \frac{\partial^2 \delta_x}{\partial x \partial y} = 0 \quad (\text{A13})$$

Using similar scaling arguments as above, Eq. A13 reduces to,

$$\frac{\partial^2 \bar{\delta}_y}{\partial y^2} = 0 \quad (\text{A14})$$

which is identical to Eq. 22.
